# Supplementary material for: Efficacy of Western, Eastern, and Venezuelan Equine Encephalitis (WEVEE) Virus-Replicon Particle (VRP) Vaccine against WEEV in a Non-Human Primate Animal Model
Source: MDPI journal article supplement (doi:10.3390/v14071502), 2022-07-08
Supplement: s1 [file s1]

## Supplementary Materials for

Burke, C.W. et al. Efficacy of Western, Eastern, and Venezuelan Equine Encephalitis (WEVEE) Virus-Replicon Particle (VRP) Vaccine against WEEV in a Non-human Primate Animal Model

**Table S1.** Summary of Significant Histologic Results by Study Animal

| Study ID                                                                | Central Nervous System Lesions        | Tissues with Lymphoid Hyperplasia | Lesions Not caused by WEEV Infection | Tissues Not Evaluated Histologically |
|-------------------------------------------------------------------------|---------------------------------------|-----------------------------------|--------------------------------------|--------------------------------------|
| Intramuscular Delivery of WEVEE VRP Vaccine (IMVRP) or Control (IMCTRL) |                                       |                                   |                                      |                                      |
| IMVRP-1                                                                 | NSL                                   | Spleen, tonsils, TB LN            | NSL                                  | N/A                                  |
| IMVRP-2                                                                 | Perivascular cuffs                    | Spleen, tonsils, LNs              | NSL                                  | N/A                                  |
| IMVRP-3                                                                 | NSL                                   | Spleen, tonsils, LNs              | NSL                                  | N/A                                  |
| IMVRP-4                                                                 | NSL                                   | Spleen, tonsils, LNs              | NSL                                  | AX & Popliteal LNs                   |
| IMVRP-5                                                                 | NSL                                   | Spleen, tonsils, LNs              | NSL                                  | Popliteal LN                         |
| IMVRP-6                                                                 | NSL                                   | Spleen, tonsils, LNs              | Rhinitis                             | Bone marrow                          |
| IMVRP-7                                                                 | Perivascular cuffs                    | Spleen, tonsils, LNs              | NSL                                  | N/A                                  |
| IMCTRL-1                                                                | Encephalitis                          | Spleen, tonsils, TB LN            | Chronic rhinitis                     | Stomach                              |
| IMCTRL-2                                                                | NSL                                   | Spleen, tonsils, LNs              | NSL                                  | N/A                                  |
| IMCTRL-3                                                                | Meningo-encephalitis                  | Spleen, tonsils, LNs              | NSL                                  | Popliteal LN                         |
| IMCTRL-4                                                                | Encephalitis                          | Spleen, LNs                       | Pleural fibrosis                     | Stomach                              |
| IMCTRL-5                                                                | Encephalitis                          | Spleen, tonsils, LNs              | NSL                                  | N/A                                  |
| IMCTRL-6                                                                | Encephalitis                          | Spleen, LNs                       | NSL                                  | Tonsil, bone marrow                  |
| Intradermal Delivery of WEVEE VRP Vaccine (IDVRP) or Control (IDCTRL)   |                                       |                                   |                                      |                                      |
| IDVRP-1                                                                 | NSL                                   | Spleen, tonsil                    | NSL                                  | PTGL, popliteal LN                   |
| IDVRP-2                                                                 | Perivascular cuff                     | Spleen, tonsils, LNs              | Gastritis                            | N/A                                  |
| IDVRP-3                                                                 | NSL                                   | Spleen, tonsils, LNs              | Gastritis                            | Popliteal LN                         |
| IDVRP-4                                                                 | Perivascular cuff                     | Spleen, tonsils, LNs              | NSL                                  | PTGL, popliteal LN                   |
| IDVRP-5                                                                 | NSL                                   | Spleen, LNs                       | Gastroenteritis                      | Popliteal LN                         |
| IDVRP-6                                                                 | NSL                                   | Spleen, tonsils, LNs              | Rhinitis, gastritis                  | N/A                                  |
| IDVRP-7                                                                 | Perivascular cuff                     | Spleen, tonsils, LNs              | Pleural fibrosis                     | Popliteal LN                         |
| IDCTRL-1*                                                               | Meningo-encephalitis                  | Spleen                            | Seminal vesiculitis                  | Popliteal LN                         |
| IDCTRL-2                                                                | Encephalitis                          | Spleen, tonsils, LNs              | Gastroenteritis                      | Popliteal LN                         |
| IDCTRL-3                                                                | Encephalitis, myelitis                | Spleen, tonsils, LNs              | NSL                                  | Popliteal LN                         |
| IDCTRL-4                                                                | Encephalitis                          | Spleen, LNs                       | NSL                                  | Tonsil                               |
| IDCTRL-5                                                                | Hydrocephalus, encephalitis, myelitis | Spleen, tonsils, LNs              | NSL                                  | Stomach                              |

|                                                    |                                                |                            |                  |                |
|----------------------------------------------------|------------------------------------------------|----------------------------|------------------|----------------|
| IDCTRL-6*                                          | Meningo-<br>encephalitis,<br>spinal meningitis | Spleen, tonsils, LNs       | NSL              | Popliteal LN   |
| Subcutaneous Delivery of WEVEE VRP Vaccine (SCVRP) |                                                |                            |                  |                |
| SCVRP-1                                            | NSL                                            | Spleen, tonsils, LNs       | NSL              | Olfactory bulb |
| SCVRP-2                                            | NSL                                            | Spleen, tonsils, LNs       | Pleural fibrosis | Duodenum       |
| SCVRP-3                                            | Perivascular cuff                              | Spleen, tonsils,<br>MES LN | NSL              | N/A            |
| SCVRP-4                                            | NSL                                            | Spleen, tonsils, LNs       | NSL              | Popliteal LN   |
| SCVRP-5                                            | NSL                                            | Spleen, tonsils, LNs       | NSL              | N/A            |
| SCVRP-6                                            | NSL                                            | Spleen, tonsils, LNs       | NSL              | N/A            |
| SCVRP-7                                            | NSL                                            | Spleen, tonsils, LNs       | NSL              | Popliteal LN   |

\*euthanatized on day 8 post-exposure (PE); all other NHPs were euthanized at study endpoint, day 28 PE

WEVEE = western, eastern, and Venezuelan equine encephalitis;

NSL = no significant lesion, LN = lymph node, TB = tracheobronchial, MES = mesenteric, AX = axillary, PTGL = pituitary gland, N/A = not applicable
